# Supplementary material for: The demographics of human and malaria movement and migration patterns in East Africa
Source: PubMed Central journal article supplement (PMC3829999; doi:10.1186/1475-2875-12-397), 2013-11-05
Supplement: 1475-2875-12-397-S3.pdf [file 1475-2875-12-397-S3.pdf]

**Figure 1. Short term travel in migrant populations, stratified by rural urban status of current locations in Kenya** (based on the Kenya Integrated Household Budget Survey - KIHBS)

Short term travel patterns were shown to vary between gender groups in rural and urban areas, with significant decreases in travel between >5 and 5-10 year old age groups for males from both rural and urban areas and females from rural areas. However, females from urban areas showed similar travel patterns throughout their lifespan, slightly increasing for older ages. Generally, in both rural and urban areas, male travel was higher in older age groups. Amongst children, highest travel was seen in youngest children, being likely to travel with their parents. 5-10 year children had lower rates of travel. However in older adolescent children in the 10-20 year age group, increases in travel amongst urban male migrants was seen. This may be a result of male migrant adolescents travelling back home to visit families during boarding school holidays.

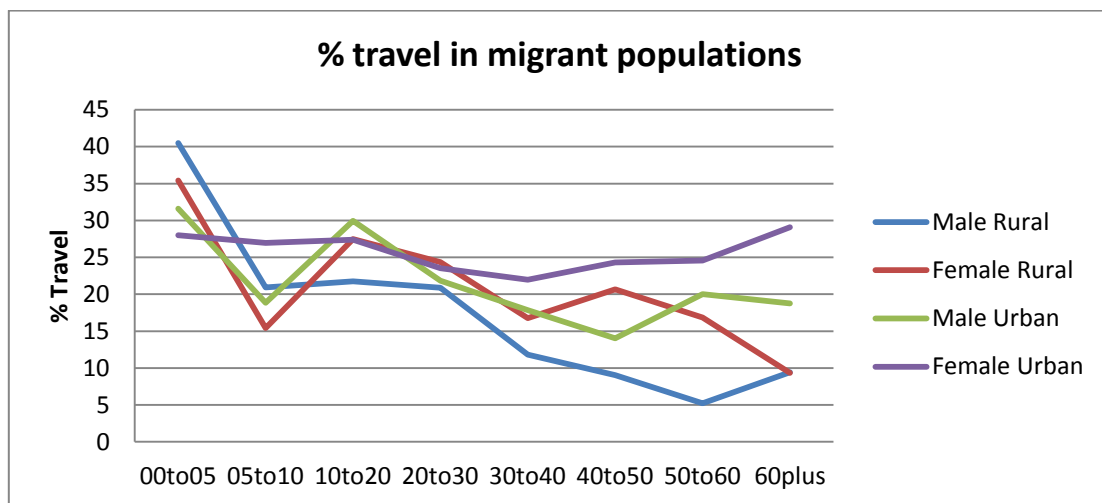

**Figure 2. Short term travel in migrant groups, stratified by current district of residence in Kenya**

Short term travel from low transmission to high transmission areas is a risk factor for malaria importation. This figure illustrates heterogeneity in short term travel patterns in migrants in different parts of Kenya.

(a) % migrants engaging in short term travel

(b) Mean PfPR per district

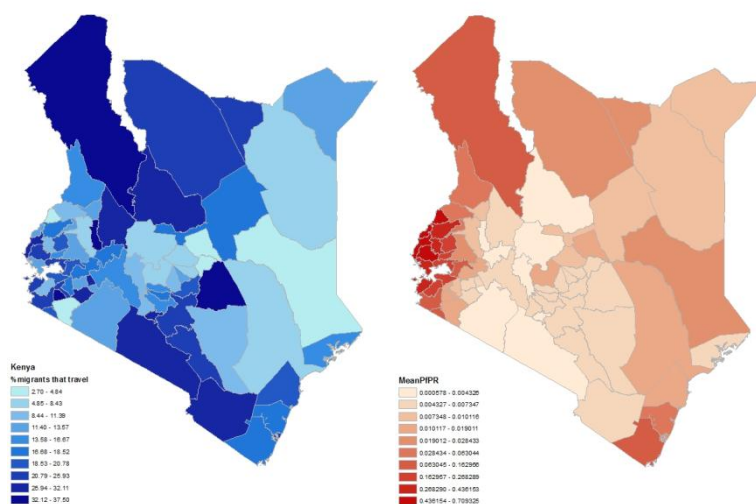

### Regression Analysis results:

Dependent variables are travel and bed net use. Independent variables are age group, gender and migration status. Each independent variable is categorical.

#### Linear regression model 1:

Regress: Travel ~ AgeGroup + Gender + Migrant

Results:

| Independent variable | Coefficient | Standard error | t      | p-value |
|----------------------|-------------|----------------|--------|---------|
| AgeGroup5-10         | 0.002318    | 0.004347       | 0.533  | 0.59    |
| AgeGroup10-20        | 0.06046     | 0.003866       | 15.686 | <0.05   |
| AgeGroup20-30        | 0.121544    | 0.004226       | 28.763 | <0.05   |
| AgeGroup30-40        | 0.068702    | 0.004774       | 14.392 | <0.05   |
| AgeGroup40-50        | 0.062332    | 0.005310       | 11.739 | <0.05   |
| AgeGroup50-60        | 0.044329    | 0.006290       | 7.048  | <0.05   |
| AgeGroup60plus       | 0.025906    | 0.005991       | 4.324  | <0.05   |
| GenderFemale         | -0.020596   | 0.002348       | -8.773 | <0.05   |
| Migrants             | 0.310178    | 0.019912       | 15.578 | <0.05   |

R-squared: 0.02165

#### Linear regression model 2:

Regress: Bednet ~ AgeGroup + Gender + Migrant

Results:

| Independent variable | Coefficient | Standard error | t       | p-value |
|----------------------|-------------|----------------|---------|---------|
| AgeGroup5-10         | -0.1027218  | 0.0066568      | -15.431 | <0.05   |
| AgeGroup10-20        | -0.1583671  | 0.0059205      | -26.749 | <0.05   |
| AgeGroup20-30        | -0.0426922  | 0.0064708      | -6.598  | <0.05   |
| AgeGroup30-40        | -0.0004049  | 0.0073097      | -0.055  | 0.96    |
| AgeGroup40-50        | -0.0574785  | 0.0081311      | -7.069  | <0.05   |
| AgeGroup50-60        | -0.1139525  | 0.0096313      | -11.831 | <0.05   |
| AgeGroup60plus       | -0.174645   | 0.0091736      | -19.038 | <0.05   |
| GenderFemale         | 0.0259087   | 0.0035949      | 7.207   | <0.05   |
| Migrants             | 0.1020865   | 0.0304905      | 3.348   | <0.05   |

Reference groups = AgeGroup<5, GenderMale and Non-migrants

R-squared: 0.02017
